# Supplementary material for: The Attenuated Live Yellow Fever Virus 17D Infects the Thymus and Induces Thymic Transcriptional Modifications of Immunomodulatory Genes in C57BL/6 and BALB/C Mice
Source: PubMed Central journal article supplement (PMC4589579; doi:10.1155/2015/503087), 2015-09-17
Supplement: 503087.f1.pdf [file 503087.f1.pdf]

## Supplemental Data

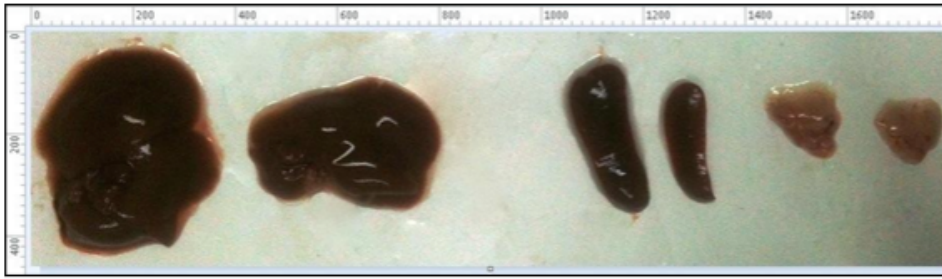

**I: Visual inspection of Liver, Spleen and Thymus of BALB/c (Left) and C57BL/6 (right) 7 days after inoculation of 10,000 LD<sub>50</sub> of yellow fever virus (YFV17D). Representative of at least 5 independent samples.**

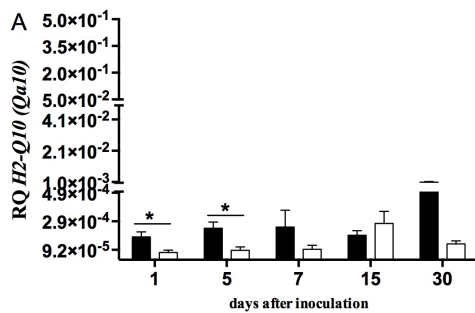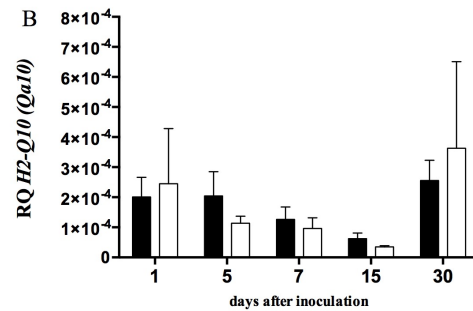

**II - Gene expression of *H2-Q10*(Qa10) in thymus of (A) C57BL/6 and (B) BALB/c mice inoculated with 10.000 LD<sub>50</sub> of YFV17D or PBS. RQ = Relative Quantification representative of geometric mean values of  $2^{-\Delta\Delta C_t}$ . Tissue samples were obtained in triplicate from different animals for each treatment. Each experiment was independently performed at least three times. Statistical analysis was performed using the non-parametric test Mann-Whitney two-tailed. Values close to the level of significance ( $P < 0.05$ ) are marked with (\*).**

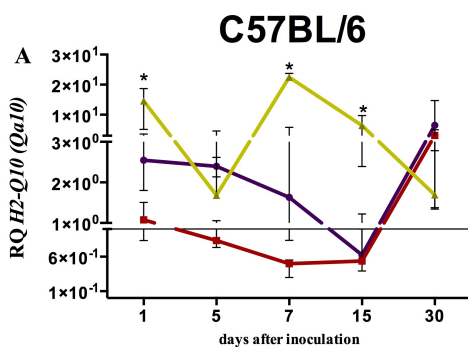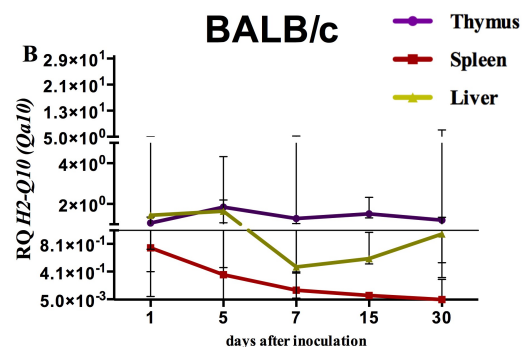

**III - Transcriptional profiles of *H2-Q10Qa-10* in harvested tissues of (A) C56BL/6 and (B) BALB/c mice inoculated with 10.000 LD<sub>50</sub> of YFV17D.** RQ = Relative Quantification representative of geometric mean values of  $2^{-\Delta\Delta C_t}$ . RQ values expressed as fold change relative to control group values (baseline = 1). Statistical analysis was performed using the non-parametric test Kruskal-Wallis Dunn's multiple comparison. Values close to the level of significance ( $P < 0.05$ ) are marked with (\*).
